# Supplementary material for: Microbiological and Toxicological Hazards in Sewage Treatment Plant Bioaerosol and Dust
Source: MDPI journal article supplement (doi:10.3390/toxins13100691), 2021-09-28
Supplement: s1 [file s1]

# Supplementary material: Microbiological and Toxicological Hazards in Sewage Treatment Plant Bioaerosol and Dust

Justyna Szulc, Małgorzata Okrasa, Katarzyna Majchrzycka, Michael Sulyok, Adriana Nowak, Tomasz Ruman, Joanna Nizioł, Bogumiła Szponar and Beata Gutarowska

Table S1. Diversity of bacterial/archeal genera in dust and air samples.

| Domain   | Phylum          | Genus                        | Abundance of Bacterial/Archeal Genera in Samples, %* |       |
|----------|-----------------|------------------------------|------------------------------------------------------|-------|
|          |                 |                              | Air                                                  | Dust  |
| Archaea  | Euryarchaeota   | <i>Methanosaeta</i>          | 0.002                                                | 0.002 |
|          | Thermi          | <i>Deinococcus</i>           | 0.023                                                | 3.000 |
|          | Acidobacteria   | Unidentified                 | 0.048                                                | 0.186 |
| Bacteria | Actinobacteria  | <i>Actinomyces</i>           | 0.005                                                | 0.000 |
|          |                 | <i>Agrococcus</i>            | 0.000                                                | 0.005 |
|          |                 | <i>Agromyces</i>             | 0.000                                                | 0.005 |
|          |                 | <i>Amycolatopsis</i>         | 0.000                                                | 0.027 |
|          |                 | <i>Arcanobacterium</i>       | 0.000                                                | 0.010 |
|          |                 | <i>Arthrobacter</i>          | 0.005                                                | 0.094 |
|          |                 | <i>Bifidobacterium</i>       | 6.000                                                | 5.000 |
|          |                 | <i>Brevibacterium</i>        | 0.002                                                | 0.360 |
|          |                 | <i>Candidatus Microthrix</i> | 0.345                                                | 0.941 |
|          |                 | <i>Cellulomonas</i>          | 0.041                                                | 0.000 |
|          |                 | <i>Cellulosimicrobium</i>    | 59.000                                               | 0.706 |
|          |                 | <i>Collinsella</i>           | 0.007                                                | 0.031 |
|          |                 | <i>Corynebacterium</i>       | 0.025                                                | 1.000 |
|          |                 | <i>Gordonia</i>              | 0.301                                                | 3.000 |
|          |                 | <i>Kocuria</i>               | 0.002                                                | 0.046 |
|          |                 | <i>Kribbella</i>             | 0.000                                                | 0.007 |
|          |                 | <i>Mycobacterium</i>         | 0.411                                                | 0.832 |
|          |                 | <i>Nesterenkonia</i>         | 0.007                                                | 0.174 |
|          |                 | <i>Nocardia</i>              | 0.000                                                | 0.015 |
|          |                 | <i>Patulibacter</i>          | 0.000                                                | 0.140 |
|          |                 | <i>Piscicoccus</i>           | 0.000                                                | 0.106 |
|          |                 | <i>Propionibacterium</i>     | 0.032                                                | 0.051 |
|          |                 | <i>Propionicimonas</i>       | 0.005                                                | 0.029 |
|          |                 | <i>Pseudonocardia</i>        | 0.000                                                | 0.031 |
|          |                 | <i>Rhodococcus</i>           | 0.002                                                | 0.699 |
|          |                 | <i>Saccharomonospora</i>     | 0.000                                                | 0.002 |
|          |                 | <i>Solirubrobacter</i>       | 0.005                                                | 0.000 |
|          |                 | <i>Terracoccus</i>           | 0.096                                                | 1.000 |
|          |                 | <i>Thermobispora</i>         | 0.000                                                | 0.010 |
|          |                 | <i>Thermocristum</i>         | 0.000                                                | 0.007 |
|          |                 | <i>Tsukamurella</i>          | 0.007                                                | 0.106 |
|          |                 | <i>Verrucosipora</i>         | 0.000                                                | 0.005 |
|          |                 | Unidentified                 | 1.615                                                | 5.864 |
|          | Armatimonadetes | Unidentified                 | 0.005                                                | 0.042 |
|          | Bacteroidetes   | <i>Bacteroides</i>           | 0.009                                                | 0.007 |

|               |                                   |       |        |
|---------------|-----------------------------------|-------|--------|
|               | <i>Chryseobacterium</i>           | 0.023 | 10.000 |
|               | <i>Dysgonomonas</i>               | 0.005 | 0.000  |
|               | <i>Flavisolibacter</i>            | 0.009 | 0.005  |
|               | <i>Flavobacterium</i>             | 0.014 | 0.000  |
|               | <i>Hymenobacter</i>               | 0.005 | 0.015  |
|               | <i>Niabella</i>                   | 0.011 | 0.005  |
|               | <i>Paludibacter</i>               | 0.009 | 0.010  |
|               | <i>Parabacteroides</i>            | 0.000 | 0.005  |
|               | <i>Pedobacter</i>                 | 0.000 | 0.046  |
|               | <i>Pontibacter</i>                | 0.000 | 0.015  |
|               | <i>Rubricoccus</i>                | 0.000 | 0.015  |
|               | <i>Sediminibacterium</i>          | 0.005 | 0.005  |
|               | <i>Wautersiella</i>               | 0.000 | 0.002  |
|               | <i>Weeksella</i>                  | 0.000 | 0.058  |
|               | Unidentified                      | 0.661 | 0.561  |
| Chlamydiae    | <i>Candidatus Rhabdochlamydia</i> | 0.005 | 0.000  |
|               | Unidentified                      | 0.014 | 0.000  |
| Chlorobi      | Unidentified                      | 0.117 | 0.097  |
| Chloroflexi   | Unidentified                      | 0.168 | 0.539  |
| Cyanobacteria | <i>Microcoleus</i>                | 0.000 | 0.015  |
|               | <i>Nostoc</i>                     | 0.000 | 0.022  |
|               | Unidentified                      | 0.070 | 0.907  |
| Firmicutes    | <i>Aerococcus</i>                 | 0.000 | 0.019  |
|               | <i>Anaerosinus</i>                | 0.005 | 0.000  |
|               | <i>Anoxybacillus</i>              | 0.000 | 0.005  |
|               | <i>Bacillus</i>                   | 0.075 | 0.440  |
|               | <i>Blautia</i>                    | 0.011 | 0.002  |
|               | <i>Brevibacillus</i>              | 0.000 | 0.010  |
|               | <i>Caldicoprobacter</i>           | 0.000 | 0.005  |
|               | <i>Caloramator</i>                | 0.000 | 0.034  |
|               | <i>Clostridium</i>                | 0.041 | 0.331  |
|               | <i>Dorea</i>                      | 0.005 | 0.005  |
|               | <i>Enterococcus</i>               | 0.009 | 0.181  |
|               | <i>Ethanoligenens</i>             | 0.000 | 0.007  |
|               | <i>Exiguobacterium</i>            | 0.005 | 0.293  |
|               | <i>Facklamia</i>                  | 0.002 | 0.022  |
|               | <i>Faecalibacterium</i>           | 0.000 | 0.010  |
|               | <i>Finegoldia</i>                 | 0.005 | 0.000  |
|               | <i>Geobacillus</i>                | 0.000 | 0.019  |
|               | <i>Granulicatella</i>             | 0.005 | 0.000  |
|               | <i>Jeotgalicoccus</i>             | 0.005 | 0.075  |
|               | <i>Lachnospira</i>                | 0.000 | 0.010  |
|               | <i>Lactobacillus</i>              | 0.021 | 0.019  |
|               | <i>Lactococcus</i>                | 0.005 | 0.010  |
|               | <i>Lutispora</i>                  | 0.000 | 0.012  |
|               | <i>Lysinibacillus</i>             | 0.000 | 0.031  |
|               | <i>Macrococcus</i>                | 0.002 | 0.160  |
|               | <i>Megamonas</i>                  | 0.009 | 0.000  |
|               | <i>Natronobacillus</i>            | 0.000 | 0.010  |
|               | <i>Oscillospira</i>               | 0.009 | 0.000  |
|               | <i>Paenibacillus</i>              | 0.000 | 0.005  |

|                  |                          |       |        |
|------------------|--------------------------|-------|--------|
|                  | <i>Pediococcus</i>       | 0.005 | 0.002  |
|                  | <i>Planifilum</i>        | 0.000 | 0.017  |
|                  | <i>Planococcus</i>       | 0.005 | 0.534  |
|                  | <i>Roseburia</i>         | 0.000 | 0.017  |
|                  | <i>Ruminococcus</i>      | 0.023 | 0.077  |
|                  | <i>Rummeliibacillus</i>  | 0.002 | 0.099  |
|                  | <i>Salinicoccus</i>      | 0.005 | 0.138  |
|                  | <i>Sporomusa</i>         | 0.000 | 0.005  |
|                  | <i>Staphylococcus</i>    | 0.014 | 0.626  |
|                  | <i>Streptococcus</i>     | 0.053 | 0.039  |
|                  | <i>Syntrophomonas</i>    | 0.053 | 0.060  |
|                  | <i>Tepidibacter</i>      | 0.000 | 0.044  |
|                  | <i>Tepidimicrobium</i>   | 0.000 | 0.022  |
|                  | <i>Trichococcus</i>      | 0.000 | 0.053  |
|                  | <i>Turicibacter</i>      | 0.048 | 0.909  |
|                  | <i>Vagococcus</i>        | 0.000 | 0.005  |
|                  | Unidentified             | 1.524 | 17.413 |
| Fusobacteria     | <i>Leptotrichia</i>      | 0.000 | 0.007  |
|                  | Unidentified             | 0.010 | 0.005  |
| Gemmatimonadetes | Unidentified             | 0.000 | 0.010  |
| Nitrospirae      | <i>Nitrospira</i>        | 0.014 | 0.048  |
| Planctomycetes   | Unidentified             | 0.024 | 0.063  |
| Proteobacteria   | <i>Achromobacter</i>     | 0.053 | 0.000  |
|                  | <i>Acinetobacter</i>     | 0.050 | 4.000  |
|                  | <i>Agrobacterium</i>     | 0.007 | 0.184  |
|                  | <i>Allochromatium</i>    | 0.171 | 0.075  |
|                  | <i>Aquabacterium</i>     | 0.132 | 0.005  |
|                  | <i>Aquicella</i>         | 0.002 | 0.007  |
|                  | <i>Arcobacter</i>        | 0.119 | 0.000  |
|                  | <i>Aurantimonas</i>      | 0.002 | 0.007  |
|                  | <i>Balneimonas</i>       | 0.005 | 0.044  |
|                  | <i>Bdellovibrio</i>      | 0.005 | 0.015  |
|                  | <i>Blastomonas</i>       | 0.023 | 0.022  |
|                  | <i>Brachymonas</i>       | 0.005 | 0.000  |
|                  | <i>Brevundimonas</i>     | 0.011 | 0.363  |
|                  | <i>Burkholderia</i>      | 0.892 | 0.029  |
|                  | <i>Dechloromonas</i>     | 0.062 | 0.015  |
|                  | <i>Delftia</i>           | 0.000 | 0.007  |
|                  | <i>Desulfobulbus</i>     | 0.000 | 0.005  |
|                  | <i>Devosia</i>           | 0.005 | 0.068  |
|                  | <i>Dokdonella</i>        | 0.050 | 0.000  |
|                  | <i>Eikenella</i>         | 0.005 | 0.000  |
|                  | <i>Enhydrobacter</i>     | 0.014 | 0.708  |
|                  | <i>Erwinia</i>           | 0.000 | 0.000  |
|                  | <i>Erythrobacter</i>     | 0.000 | 0.005  |
|                  | <i>Escherichia</i>       | 0.032 | 0.060  |
|                  | <i>Gyrocarpus</i>        | 0.000 | 0.005  |
|                  | <i>Hyphomicrobium</i>    | 0.014 | 0.077  |
|                  | <i>Janthinobacterium</i> | 0.000 | 0.005  |
|                  | <i>Kaistobacter</i>      | 0.005 | 0.058  |
|                  | <i>Kingella</i>          | 0.406 | 0.118  |

|                 |                          |        |        |
|-----------------|--------------------------|--------|--------|
|                 | <i>Lardizabala</i>       | 0.000  | 0.007  |
|                 | <i>Luteimonas</i>        | 0.000  | 0.024  |
|                 | <i>Methylobacterium</i>  | 0.000  | 0.012  |
|                 | <i>Mycoplana</i>         | 0.002  | 0.247  |
|                 | <i>Myristica</i>         | 0.000  | 0.002  |
|                 | <i>Nannocystis</i>       | 0.011  | 0.000  |
|                 | <i>Nitrosomonas</i>      | 0.005  | 0.000  |
|                 | <i>Ochrobactrum</i>      | 0.018  | 0.109  |
|                 | <i>Pantoea</i>           | 0.069  | 0.551  |
|                 | <i>Perlucidibaca</i>     | 0.116  | 0.007  |
|                 | <i>Pirellula</i>         | 0.000  | 0.012  |
|                 | <i>Planctomyces</i>      | 0.005  | 0.012  |
|                 | <i>Plesiomonas</i>       | 0.000  | 0.063  |
|                 | <i>Propionivibrio</i>    | 0.005  | 0.000  |
|                 | <i>Proteus</i>           | 0.000  | 0.034  |
|                 | <i>Providencia</i>       | 0.000  | 0.007  |
|                 | <i>Pseudochrobactrum</i> | 0.007  | 0.053  |
|                 | <i>Pseudomonas</i>       | 12.000 | 4.000  |
|                 | <i>Psychrobacter</i>     | 0.016  | 4.000  |
|                 | <i>Rhodobacter</i>       | 0.000  | 0.005  |
|                 | <i>Rhodoferax</i>        | 0.073  | 0.015  |
|                 | <i>Rhodoplanes</i>       | 0.000  | 0.027  |
|                 | <i>Roseococcus</i>       | 0.000  | 0.005  |
|                 | <i>Rubellimicrobium</i>  | 0.002  | 0.022  |
|                 | <i>Serratia</i>          | 0.009  | 2.000  |
|                 | <i>Skermanella</i>       | 0.005  | 0.070  |
|                 | <i>Sphingobium</i>       | 0.000  | 0.017  |
|                 | <i>Sphingomonas</i>      | 0.016  | 4.000  |
|                 | <i>Stenotrophomonas</i>  | 8.000  | 1.039  |
|                 | <i>Syntrophus</i>        | 0.100  | 0.007  |
|                 | <i>Thermomonas</i>       | 0.000  | 0.024  |
|                 | <i>Tolumonas</i>         | 0.005  | 0.000  |
|                 | <i>Wohlfahrtiimonas</i>  | 0.000  | 0.005  |
|                 | Unidentified             | 4.619  | 14.188 |
| Spirochaetes    | <i>Treponema</i>         | 0.073  | 0.181  |
|                 | Unidentified             | 0.064  | 0.015  |
| Synergistetes   | <i>Aminiphilus</i>       | 0.011  | 0.002  |
|                 | Unidentified             | 0.062  | 0.075  |
| Tenericutes     | Unidentified             | 0.005  | 0.000  |
| Thermotogae     | <i>Fervidobacterium</i>  | 0.018  | 0.048  |
|                 | <i>Kosmotoga</i>         | 0.000  | 0.015  |
|                 | Unidentified             | 0.010  | 0.019  |
| Verrucomicrobia | <i>Chthoniobacter</i>    | 0.000  | 0.005  |
|                 | <i>Luteolibacter</i>     | 0.009  | 0.012  |
|                 | <i>Opitutus</i>          | 0.005  | 0.000  |
|                 | <i>Prostheco bacter</i>  | 0.018  | 0.000  |
|                 | <i>Verrucomicrobium</i>  | 0.009  | 0.000  |
|                 | Unidentified             | 0.016  | 0.024  |
| Unidentified    |                          | 0.865  | 3.028  |
| Unassigned      |                          | 0.064  | 0.169  |

\*percentage share of studied genera greater than 0.001%.

Table S2. Diversity of fungal genera in dust and air samples.

| Phylum     | Order                            | Genera                     | Abundance of Fungal Genera in Samples. %* |        |
|------------|----------------------------------|----------------------------|-------------------------------------------|--------|
|            |                                  |                            | Air                                       | Dust   |
| Ascomycota | <i>Lichenostigmatales</i>        | <i>Phaeococcomyces</i>     | 0.000                                     | 0.014  |
|            | <i>Ascomycota Incertae sedis</i> | <i>Anguillospora</i>       | 0.008                                     | 0.005  |
|            |                                  | <i>Engyodontium</i>        | 0.003                                     | 0.001  |
|            |                                  | <i>Radulidium</i>          | 0.007                                     | 0.012  |
|            | <i>Botryosphaerales</i>          | <i>Diplodia</i>            | 0.000                                     | 0.008  |
|            |                                  | unidentified               | 0.001                                     | 0.015  |
|            | <i>Capnodiales</i>               | <i>Arthrocatena</i>        | 0.000                                     | 0.005  |
|            |                                  | <i>Camarosporula</i>       | 0.005                                     | 0.000  |
|            |                                  | <i>Capnobotryella</i>      | 0.003                                     | 0.000  |
|            |                                  | <i>Catenulostroma</i>      | 0.012                                     | 0.000  |
|            |                                  | <i>Cladosporium</i>        | 14.000                                    | 6.000  |
|            |                                  | <i>Devriesia</i>           | 0.025                                     | 0.001  |
|            |                                  | <i>Dissoconium</i>         | 1.000                                     | 0.001  |
|            |                                  | <i>Dothistroma</i>         | 0.001                                     | 0.001  |
|            |                                  | <i>Extremus</i>            | 0.013                                     | 0.001  |
|            |                                  | <i>Mycosphaerella</i>      | 7.000                                     | 12.000 |
|            |                                  | <i>Neocatenulostroma</i>   | 0.004                                     | 0.033  |
|            |                                  | <i>Neodevriesia</i>        | 0.017                                     | 0.000  |
|            |                                  | <i>Periconiella</i>        | 0.003                                     | 0.000  |
|            |                                  | <i>Phaeothecoidea</i>      | 0.000                                     | 0.012  |
|            |                                  | <i>Rachicladosporium</i>   | 0.022                                     | 0.000  |
|            |                                  | <i>Ramichloridium</i>      | 0.003                                     | 0.000  |
|            |                                  | <i>Ramularia</i>           | 0.114                                     | 0.184  |
|            |                                  | <i>Sphaerulina</i>         | 0.121                                     | 0.013  |
|            |                                  | <i>Toxicocladosporium</i>  | 0.016                                     | 0.001  |
|            |                                  | <i>Uwebraunia</i>          | 0.177                                     | 0.000  |
|            |                                  | <i>Vermiconia</i>          | 0.017                                     | 0.000  |
|            |                                  | <i>Verrucocladosporium</i> | 0.000                                     | 0.007  |
|            |                                  | <i>Zygophiala</i>          | 0.049                                     | 0.000  |
|            |                                  | <i>Zymoseptoria</i>        | 0.023                                     | 0.007  |
|            |                                  | unidentified               | 0.070                                     | 0.094  |
|            | <i>Dothideales</i>               | <i>Aureobasidium</i>       | 0.099                                     | 0.162  |
|            |                                  | <i>Endoconidioma</i>       | 0.052                                     | 0.000  |
|            |                                  | <i>Hormonema</i>           | 0.000                                     | 0.016  |
|            |                                  | unidentified               | 0.000                                     | 0.015  |
|            | <i>Dothideomycetes</i>           | <i>Arthrographis</i>       | 0.000                                     | 0.077  |
|            |                                  | <i>Leptospora</i>          | 0.114                                     | 0.115  |
|            |                                  | <i>Perusta</i>             | 0.000                                     | 0.007  |
|            |                                  | <i>Thyrostroma</i>         | 0.000                                     | 0.003  |
|            | <i>Myriangiales</i>              | <i>Endosporium</i>         | 0.017                                     | 0.000  |
|            |                                  | unidentified               | 0.000                                     | 0.008  |
|            | <i>Pleosporales</i>              | <i>Acicuseptoria</i>       | 0.000                                     | 0.012  |
|            |                                  | <i>Alternaria</i>          | 5.000                                     | 4.000  |
|            |                                  | <i>Angustimassarina</i>    | 0.000                                     | 0.014  |
|            |                                  | <i>Biappendiculispora</i>  | 0.000                                     | 0.006  |
|            |                                  | <i>Bipolaris</i>           | 0.074                                     | 0.005  |

|                        |                           |       |       |
|------------------------|---------------------------|-------|-------|
|                        | <i>Camarosporium</i>      | 0.000 | 0.001 |
|                        | <i>Chalastospora</i>      | 0.787 | 3.000 |
|                        | <i>Corynespora</i>        | 0.000 | 0.003 |
|                        | <i>Dendrothyrium</i>      | 0.000 | 0.002 |
|                        | <i>Dendryphiella</i>      | 0.017 | 0.000 |
|                        | <i>Dendryphion</i>        | 0.005 | 0.035 |
|                        | <i>Didymella</i>          | 2.000 | 4.000 |
|                        | <i>Keissleriella</i>      | 0.000 | 0.009 |
|                        | <i>Leptosphaeria</i>      | 0.000 | 0.002 |
|                        | <i>Lophiostoma</i>        | 0.003 | 0.013 |
|                        | <i>Mycopappus</i>         | 0.000 | 0.005 |
|                        | <i>Neoascochyta</i>       | 0.341 | 5.000 |
|                        | <i>Neosetophoma</i>       | 0.003 | 0.029 |
|                        | <i>Paraconiothyrium</i>   | 0.000 | 0.003 |
|                        | <i>Paradendryphiella</i>  | 0.000 | 0.008 |
|                        | <i>Paraphaeosphaeria</i>  | 0.000 | 0.002 |
|                        | <i>Periconia</i>          | 0.587 | 0.127 |
|                        | <i>Phaeosphaeria</i>      | 0.003 | 0.006 |
|                        | <i>Plenodomus</i>         | 0.000 | 0.002 |
|                        | <i>Pleurophoma</i>        | 0.000 | 0.005 |
|                        | <i>Preussia</i>           | 0.000 | 0.008 |
|                        | <i>Prosthemium</i>        | 0.000 | 0.005 |
|                        | <i>Pyrenochaeta</i>       | 0.000 | 0.002 |
|                        | <i>Pyrenochaetopsis</i>   | 0.009 | 0.002 |
|                        | <i>Pyrenophora</i>        | 0.000 | 0.267 |
|                        | <i>Sclerostagonospora</i> | 0.012 | 0.080 |
|                        | <i>Setomelanomma</i>      | 0.000 | 0.014 |
|                        | <i>Setoseptoria</i>       | 0.005 | 0.002 |
|                        | <i>Spegazzinia</i>        | 0.008 | 0.003 |
|                        | <i>Sphaerellopsis</i>     | 0.000 | 0.002 |
|                        | <i>Stagonospora</i>       | 0.000 | 0.006 |
|                        | <i>Stemphylium</i>        | 0.059 | 0.353 |
|                        | <i>Torula</i>             | 0.095 | 0.042 |
|                        | <i>Westerdykella</i>      | 0.000 | 0.007 |
|                        | unidentified              | 3.854 | 1.132 |
|                        | <i>Venturia</i>           | 0.053 | 0.007 |
|                        | unidentified              | 0.049 | 0.050 |
| <i>Chaetothyriales</i> | <i>Cladophialophora</i>   | 0.000 | 0.006 |
|                        | <i>Cyphellophora</i>      | 0.000 | 0.035 |
|                        | <i>Exophiala</i>          | 0.061 | 0.409 |
|                        | <i>Knufia</i>             | 0.034 | 0.009 |
|                        | <i>Rhinocladiella</i>     | 0.000 | 0.003 |
|                        | unidentified              | 0.039 | 0.045 |
|                        | <i>Aspergillus</i>        | 2.000 | 2.000 |
| <i>Eurotiales</i>      | <i>Byssochlamys</i>       | 0.003 | 0.046 |
|                        | <i>Hamigera</i>           | 0.000 | 0.002 |
|                        | <i>Penicillium</i>        | 3.000 | 3.000 |
|                        | <i>Talaromyces</i>        | 0.059 | 0.036 |
|                        | <i>Thermomyces</i>        | 0.026 | 0.080 |
|                        | unidentified              | 0.026 | 0.012 |
| <i>Onygenales</i>      | <i>Aphanoascus</i>        | 0.003 | 0.000 |

|                       |                         |       |       |
|-----------------------|-------------------------|-------|-------|
|                       | <i>Ascosphaera</i>      | 0.000 | 0.008 |
|                       | <i>Chrysosporium</i>    | 0.008 | 0.075 |
|                       | <i>Eremascus</i>        | 0.000 | 0.007 |
|                       | <i>Leucothecium</i>     | 0.000 | 0.001 |
|                       | unidentified            | 0.001 | 0.003 |
| <i>Lecanorales</i>    | <i>Lecania</i>          | 0.031 | 0.032 |
|                       | <i>Scoliciosporum</i>   | 0.000 | 0.301 |
|                       | unidentified            | 0.000 | 0.002 |
| <i>Pertusariales</i>  | unidentified            | 0.000 | 0.005 |
| <i>Teloschistales</i> | <i>Athallia</i>         | 0.005 | 0.000 |
|                       | unidentified            | 0.000 | 0.003 |
| <i>Erysiphales</i>    | <i>Blumeria</i>         | 0.942 | 0.138 |
|                       | <i>Erysiphe</i>         | 0.013 | 0.089 |
|                       | <i>Golovinomyces</i>    | 0.051 | 0.000 |
|                       | <i>Neoerysiphe</i>      | 0.000 | 0.002 |
|                       | <i>Podosphaera</i>      | 0.101 | 0.003 |
|                       | <i>Sawadaea</i>         | 0.012 | 0.000 |
| <i>Helotiales</i>     | <i>Articulospora</i>    | 0.009 | 0.027 |
|                       | <i>Botrytis</i>         | 0.698 | 2.000 |
|                       | <i>Calloria</i>         | 0.003 | 0.013 |
|                       | <i>Calycina</i>         | 0.005 | 0.000 |
|                       | <i>Chalara</i>          | 0.005 | 0.002 |
|                       | <i>Cistella</i>         | 0.013 | 0.002 |
|                       | <i>Claussenomyces</i>   | 0.022 | 0.003 |
|                       | <i>Cudoniella</i>       | 0.000 | 0.002 |
|                       | <i>Encoelia</i>         | 0.137 | 0.007 |
|                       | <i>Glarea</i>           | 0.000 | 0.030 |
|                       | <i>Hymenoscyphus</i>    | 0.012 | 0.005 |
|                       | <i>Hyphodiscus</i>      | 0.003 | 0.000 |
|                       | <i>Lachnum</i>          | 0.000 | 0.015 |
|                       | <i>Lanzia</i>           | 0.000 | 0.008 |
|                       | <i>Moellerodiscus</i>   | 0.000 | 0.007 |
|                       | <i>Oidiodendron</i>     | 0.009 | 0.000 |
|                       | <i>Phialocephala</i>    | 0.000 | 0.005 |
|                       | <i>Pyrenopeziza</i>     | 0.000 | 0.003 |
|                       | <i>Sclerotinia</i>      | 0.000 | 0.006 |
|                       | <i>Streptobotrys</i>    | 0.000 | 0.005 |
|                       | <i>Tetrachaetum</i>     | 0.000 | 0.035 |
|                       | <i>Torrendiella</i>     | 0.000 | 0.002 |
|                       | <i>Valdensinia</i>      | 0.018 | 0.005 |
|                       | <i>Vibrissea</i>        | 0.000 | 0.002 |
|                       | <i>Xenopolyscytalum</i> | 0.009 | 0.000 |
|                       | unidentified            | 0.096 | 0.118 |
|                       | <i>Pseudeurotium</i>    | 0.000 | 0.007 |
| <i>Leotiomyces</i>    | <i>Pseudogymnoascus</i> | 0.000 | 0.006 |
|                       | unidentified            | 0.008 | 0.005 |
| <i>Phacidiales</i>    | <i>Phacidium</i>        | 0.000 | 0.001 |
| <i>Rhytismatales</i>  | unidentified            | 0.000 | 0.005 |
| <i>Thelebolales</i>   | <i>Thelebolus</i>       | 0.000 | 0.039 |
| unidentified          | unidentified            | 0.000 | 0.003 |
| <i>Orbiliales</i>     | <i>Dactylella</i>       | 0.005 | 0.000 |

|                                |                            |       |        |
|--------------------------------|----------------------------|-------|--------|
|                                | <i>Orbilia</i>             | 0.013 | 0.002  |
|                                | <i>Cephalophora</i>        | 0.000 | 0.204  |
|                                | <i>Desmazierella</i>       | 0.023 | 0.010  |
|                                | <i>Heydenia</i>            | 0.000 | 0.007  |
| <i>Pezizales</i>               | <i>Peziza</i>              | 0.014 | 0.000  |
|                                | <i>Pseudoplectania</i>     | 0.005 | 0.000  |
|                                | <i>Tricharina</i>          | 0.004 | 0.000  |
|                                | unidentified               | 0.033 | 0.006  |
| <i>Pezizomycotina</i>          | <i>Hymenula</i>            | 0.000 | 0.002  |
|                                | <i>Blastobotrys</i>        | 0.000 | 0.053  |
|                                | <i>Candida</i>             | 2.000 | 0.206  |
|                                | <i>Citeromyces</i>         | 0.000 | 2.000  |
|                                | <i>Cyberlindnera</i>       | 0.026 | 0.008  |
|                                | <i>Debaryomyces</i>        | 0.003 | 0.031  |
|                                | <i>Diutina</i>             | 0.000 | 0.014  |
| <i>Saccharomycetales</i>       | <i>Hanseniaspora</i>       | 0.003 | 0.108  |
|                                | <i>Kazachstania</i>        | 0.009 | 0.001  |
|                                | <i>Kuraishia</i>           | 0.000 | 0.002  |
|                                | <i>Pichia</i>              | 0.005 | 0.052  |
|                                | <i>Saccharomyces</i>       | 0.013 | 0.003  |
|                                | <i>Torulaspora</i>         | 0.000 | 0.001  |
|                                | <i>Wickerhamomyces</i>     | 0.003 | 0.006  |
|                                | unidentified               | 0.001 | 0.041  |
| <i>Schizosaccharomycetales</i> | <i>Schizosaccharomyces</i> | 0.000 | 0.003  |
| <i>Boliniales</i>              | unidentified               | 0.001 | 0.008  |
|                                | <i>Coniochaeta</i>         | 0.001 | 0.005  |
| <i>Coniochaetales</i>          | <i>Lecythophora</i>        | 0.000 | 0.001  |
|                                | <i>Plagiostoma</i>         | 0.000 | 0.007  |
| <i>Diaporthales</i>            | unidentified               | 0.001 | 0.0014 |
|                                | <i>Acrostalagmus</i>       | 0.003 | 0.000  |
|                                | <i>Gibellulopsis</i>       | 0.000 | 0.009  |
| <i>Glomerellales</i>           | <i>Lectera</i>             | 0.023 | 0.008  |
|                                | <i>Musicillium</i>         | 0.003 | 0.000  |
|                                | <i>Plectosphaerella</i>    | 0.004 | 0.046  |
|                                | unidentified               | 0.001 | 0.003  |
|                                | <i>Acremonium</i>          | 0.177 | 0.124  |
|                                | <i>Beauveria</i>           | 0.000 | 0.096  |
|                                | <i>Clonostachys</i>        | 0.003 | 0.001  |
|                                | <i>Cordyceps</i>           | 0.118 | 0.105  |
|                                | <i>Cylindrium</i>          | 0.007 | 0.000  |
|                                | <i>Fusarium</i>            | 0.000 | 0.030  |
|                                | <i>Gibberella</i>          | 0.112 | 0.038  |
|                                | <i>Isaria</i>              | 0.068 | 0.350  |
| <i>Hypocreales</i>             | <i>Lecanicillium</i>       | 0.000 | 0.344  |
|                                | <i>Metarhizium</i>         | 0.004 | 0.008  |
|                                | <i>Microcera</i>           | 0.000 | 0.003  |
|                                | <i>Nectria</i>             | 0.003 | 0.003  |
|                                | <i>Neotyphodium</i>        | 0.000 | 0.002  |
|                                | <i>Paecilomyces</i>        | 0.001 | 0.015  |
|                                | <i>Pleonectria</i>         | 0.001 | 0.006  |
|                                | <i>Protocrea</i>           | 0.010 | 0.000  |



|               |                          |                         |       |       |
|---------------|--------------------------|-------------------------|-------|-------|
|               |                          | <i>Purpureocillium</i>  | 0.012 | 0.131 |
|               |                          | <i>Sarocladium</i>      | 0.144 | 0.165 |
|               |                          | <i>Simplicillium</i>    | 0.000 | 0.032 |
|               |                          | <i>Stachybotrys</i>     | 0.016 | 0.002 |
|               |                          | <i>Stilbella</i>        | 0.000 | 0.003 |
|               |                          | <i>Stylonectria</i>     | 0.005 | 0.000 |
|               |                          | <i>Tolypocladium</i>    | 0.005 | 0.000 |
|               |                          | <i>Trichoderma</i>      | 0.135 | 0.036 |
|               |                          | unidentified            | 0.652 | 0.984 |
|               | Microascales             | <i>Ceratocystis</i>     | 0.000 | 0.023 |
|               |                          | <i>Gamsia</i>           | 0.000 | 0.059 |
|               |                          | <i>Microascus</i>       | 0.079 | 0.408 |
|               |                          | <i>Parascedosporium</i> | 0.000 | 0.120 |
|               |                          | <i>Petriella</i>        | 0.000 | 0.003 |
|               |                          | <i>Scedosporium</i>     | 0.004 | 0.035 |
|               |                          | <i>Scopulariopsis</i>   | 0.000 | 0.002 |
|               |                          | unidentified            | 0.024 | 0.043 |
|               | <i>Myrmecridiales</i>    | <i>Myrmecridium</i>     | 0.070 | 0.027 |
|               | <i>Pleurotheciales</i>   | <i>Phaeoisaria</i>      | 0.000 | 0.020 |
|               | Sordariales              | <i>Chaetomium</i>       | 0.186 | 0.238 |
|               |                          | <i>Humicola</i>         | 0.000 | 0.040 |
|               |                          | <i>Lasiosphaeria</i>    | 0.004 | 0.000 |
|               |                          | <i>Myceliophthora</i>   | 0.017 | 0.016 |
|               |                          | <i>Neurospora</i>       | 0.000 | 0.020 |
|               |                          | <i>Phialemonium</i>     | 0.000 | 0.028 |
|               |                          | <i>Podospira</i>        | 0.000 | 0.008 |
|               |                          | <i>Sordaria</i>         | 0.000 | 0.002 |
|               |                          | unidentified            | 0.016 | 0.003 |
|               | <i>Sordariomycetes</i>   | <i>Rhodoveronaea</i>    | 0.000 | 0.002 |
|               | <i>Togniniales</i>       | <i>Phaeoacremonium</i>  | 0.294 | 0.023 |
|               | <i>Trichosphaeriales</i> | <i>Nigrospora</i>       | 0.157 | 0.028 |
|               | Xylariales               | <i>Annulohypoxylon</i>  | 0.005 | 0.002 |
|               |                          | <i>Arthrimum</i>        | 0.311 | 0.132 |
|               |                          | <i>Castanediella</i>    | 0.003 | 0.000 |
|               |                          | <i>Cryptosphaeria</i>   | 0.013 | 0.015 |
|               |                          | <i>Diatrypella</i>      | 0.000 | 0.002 |
|               |                          | <i>Eutypa</i>           | 0.000 | 0.002 |
|               |                          | <i>Hansfordia</i>       | 0.007 | 0.006 |
|               |                          | <i>Hypoxylon</i>        | 0.085 | 0.003 |
|               |                          | <i>Microdochium</i>     | 0.003 | 0.006 |
|               |                          | <i>Monographella</i>    | 0.111 | 0.963 |
|               |                          | <i>Nodulisporium</i>    | 0.000 | 0.002 |
|               |                          | <i>Polyscytalum</i>     | 0.003 | 0.000 |
|               |                          | <i>Truncatella</i>      | 0.012 | 0.022 |
|               |                          | unidentified            | 0.005 | 0.009 |
|               | Taphrinales              | <i>Protomyces</i>       | 0.001 | 0.008 |
|               |                          | <i>Taphrina</i>         | 0.044 | 0.457 |
| Basidiomycota | Agaricales               | <i>Agaricus</i>         | 0.217 | 0.022 |
|               |                          | <i>Agrocybe</i>         | 0.018 | 0.061 |
|               |                          | <i>Amanita</i>          | 0.264 | 0.002 |
|               |                          | <i>Baeospora</i>        | 0.027 | 0.000 |

|                        |       |       |
|------------------------|-------|-------|
| <i>Bovista</i>         | 0.066 | 0.006 |
| <i>Calvatia</i>        | 0.000 | 0.002 |
| <i>Chlorophyllum</i>   | 0.088 | 0.021 |
| <i>Clitocybe</i>       | 0.005 | 0.003 |
| <i>Clitopilus</i>      | 0.026 | 0.015 |
| <i>Collybia</i>        | 0.094 | 0.018 |
| <i>Conocybe</i>        | 0.030 | 0.025 |
| <i>Coprinellus</i>     | 1.000 | 0.646 |
| <i>Coprinopsis</i>     | 0.553 | 0.324 |
| <i>Coprinus</i>        | 0.281 | 0.014 |
| <i>Cortinarius</i>     | 0.055 | 0.000 |
| <i>Cristinia</i>       | 0.003 | 0.000 |
| <i>Cryptomarasmius</i> | 0.000 | 0.006 |
| <i>Cuphophyllum</i>    | 0.003 | 0.000 |
| <i>Echinoderma</i>     | 0.031 | 0.003 |
| <i>Entoloma</i>        | 0.003 | 0.000 |
| <i>Flammulina</i>      | 0.004 | 0.000 |
| <i>Galerina</i>        | 0.029 | 0.003 |
| <i>Gerhardtia</i>      | 0.003 | 0.000 |
| <i>Gymnopus</i>        | 0.207 | 0.250 |
| <i>Hebeloma</i>        | 0.003 | 0.000 |
| <i>Hohenbuehelia</i>   | 0.003 | 0.000 |
| <i>Hygrophorus</i>     | 0.005 | 0.000 |
| <i>Hypholoma</i>       | 3.000 | 0.271 |
| <i>Inocybe</i>         | 0.013 | 0.005 |
| <i>Kuehneromyces</i>   | 0.723 | 0.015 |
| <i>Lacrymaria</i>      | 0.023 | 0.006 |
| <i>Lepiota</i>         | 0.043 | 0.015 |
| <i>Lepista</i>         | 0.078 | 0.068 |
| <i>Leucoagaricus</i>   | 0.005 | 0.007 |
| <i>Lycoperdon</i>      | 0.566 | 0.060 |
| <i>Lyophyllum</i>      | 0.101 | 0.000 |
| <i>Macrolepiota</i>    | 0.001 | 0.003 |
| <i>Marasmius</i>       | 0.042 | 0.070 |
| <i>Melanoleuca</i>     | 0.013 | 0.000 |
| <i>Merismodes</i>      | 0.000 | 0.002 |
| <i>Mucronella</i>      | 0.007 | 0.000 |
| <i>Mycena</i>          | 0.412 | 0.018 |
| <i>Mycetinis</i>       | 0.007 | 0.005 |
| <i>Ossicaulis</i>      | 0.009 | 0.000 |
| <i>Panaeolus</i>       | 0.000 | 0.008 |
| <i>Panellus</i>        | 0.004 | 0.000 |
| <i>Paralepista</i>     | 0.039 | 0.000 |
| <i>Pholiota</i>        | 0.213 | 0.040 |
| <i>Pleurotus</i>       | 0.515 | 0.006 |
| <i>Pluteus</i>         | 0.077 | 0.020 |
| <i>Psathyrella</i>     | 0.640 | 0.332 |
| <i>Psilocybe</i>       | 0.001 | 0.558 |
| <i>Rhodocollybia</i>   | 0.087 | 0.012 |
| <i>Rhodocybe</i>       | 0.039 | 0.003 |
| <i>Rugosomyces</i>     | 0.014 | 0.003 |

|                         |                          |       |       |
|-------------------------|--------------------------|-------|-------|
|                         | <i>Strobilurus</i>       | 0.027 | 0.003 |
|                         | <i>Stropharia</i>        | 0.062 | 0.031 |
|                         | <i>Tephrocye</i>         | 0.007 | 0.000 |
|                         | <i>Tricholoma</i>        | 0.092 | 0.009 |
|                         | <i>Tricholomopsis</i>    | 0.021 | 0.000 |
|                         | <i>Tubaria</i>           | 0.003 | 0.000 |
|                         | <i>Tulostoma</i>         | 0.012 | 0.003 |
|                         | <i>Typhula</i>           | 0.016 | 0.000 |
|                         | <i>Volvariella</i>       | 0.003 | 0.000 |
|                         | <i>Volvopluteus</i>      | 0.014 | 0.002 |
|                         | <i>Xeromphalina</i>      | 0.008 | 0.000 |
|                         | unidentified             | 0.664 | 0.932 |
| <i>Agaricomycetes</i>   | <i>Oxyporus</i>          | 0.033 | 0.024 |
|                         | <i>Amylocorticiellum</i> | 0.014 | 0.000 |
| <i>Amylocorticiales</i> | <i>Amyloxeasma</i>       | 0.013 | 0.003 |
|                         | unidentified             | 0.004 | 0.000 |
|                         | <i>Athelia</i>           | 0.010 | 0.002 |
|                         | <i>Leptosporomyces</i>   | 0.160 | 0.014 |
| <i>Atheliales</i>       | <i>Piloderma</i>         | 0.004 | 0.000 |
|                         | <i>Tylospora</i>         | 0.017 | 0.014 |
|                         | unidentified             | 0.000 | 0.005 |
|                         | <i>Elmerina</i>          | 0.012 | 0.000 |
| <i>Auriculariales</i>   | <i>Exidia</i>            | 0.009 | 0.012 |
|                         | unidentified             | 0.003 | 0.014 |
|                         | <i>Boletus</i>           | 0.211 | 0.022 |
|                         | <i>Coniophora</i>        | 0.013 | 0.001 |
|                         | <i>Gyrodon</i>           | 0.007 | 0.000 |
|                         | <i>Hydnomerulius</i>     | 0.012 | 0.001 |
|                         | <i>Imleria</i>           | 0.064 | 0.018 |
|                         | <i>Leucogyrophana</i>    | 0.005 | 0.002 |
| <i>Boletales</i>        | <i>Paxillus</i>          | 0.401 | 0.016 |
|                         | <i>Pseudomerulius</i>    | 0.021 | 0.000 |
|                         | <i>Serpula</i>           | 0.109 | 0.017 |
|                         | <i>Suillus</i>           | 0.265 | 0.009 |
|                         | <i>Tapinella</i>         | 0.103 | 0.020 |
|                         | <i>Xerocomellus</i>      | 0.022 | 0.000 |
|                         | <i>Xerocomus</i>         | 0.013 | 0.007 |
|                         | unidentified             | 0.012 | 0.001 |
| <i>Cantharellales</i>   | <i>Botryobasidium</i>    | 0.392 | 0.093 |
|                         | unidentified             | 0.034 | 0.000 |
|                         | <i>Ceratobasidium</i>    | 0.017 | 0.005 |
| <i>Cantharellales</i>   | <i>Sistotrema</i>        | 0.133 | 0.027 |
|                         | <i>Thanatephorus</i>     | 0.003 | 0.018 |
|                         | unidentified             | 0.266 | 0.265 |
|                         | <i>Cinereomyces</i>      | 0.020 | 0.022 |
|                         | <i>Crustoderma</i>       | 0.022 | 0.000 |
| <i>Corticiales</i>      | <i>Cylindrobasidium</i>  | 0.005 | 0.007 |
|                         | <i>Hyphodontia</i>       | 0.304 | 0.118 |
|                         | <i>Hypochnicium</i>      | 0.021 | 0.003 |
|                         | <i>Phlebia</i>           | 0.887 | 0.168 |
|                         | <i>Schizopora</i>        | 0.007 | 0.000 |

|                        |                        |       |       |
|------------------------|------------------------|-------|-------|
|                        | <i>Scopuloides</i>     | 0.202 | 0.044 |
|                        | <i>Vuilleminia</i>     | 0.012 | 0.003 |
|                        | unidentified           | 0.008 | 0.069 |
| <i>Gloeophyllales</i>  | <i>Gloeophyllum</i>    | 0.003 | 0.005 |
| <i>Hymenochaetales</i> | <i>Fomitiporella</i>   | 0.003 | 0.000 |
|                        | <i>Fuscoporia</i>      | 0.042 | 0.021 |
|                        | <i>Inonotus</i>        | 0.018 | 0.000 |
|                        | <i>Odonticium</i>      | 0.003 | 0.000 |
|                        | <i>Peniophorella</i>   | 0.116 | 0.061 |
|                        | <i>Phaeolus</i>        | 0.003 | 0.000 |
|                        | <i>Phellinus</i>       | 0.087 | 0.022 |
|                        | <i>Pseudochaete</i>    | 0.003 | 0.000 |
|                        | <i>Resinicium</i>      | 0.330 | 0.033 |
|                        | <i>Tubulicrinis</i>    | 0.007 | 0.000 |
|                        | <i>Xanthoporia</i>     | 0.044 | 0.002 |
|                        | unidentified           | 0.026 | 0.013 |
| <i>Phallales</i>       | <i>Phallus</i>         | 0.000 | 0.123 |
| <i>Polyporales</i>     | <i>Abortiporus</i>     | 0.055 | 0.000 |
|                        | <i>Alutaceodontia</i>  | 0.031 | 0.000 |
|                        | <i>Antrodia</i>        | 0.183 | 0.048 |
|                        | <i>Antrodiella</i>     | 0.061 | 0.017 |
|                        | <i>Aphanobasidium</i>  | 0.199 | 0.025 |
|                        | <i>Atheliachaete</i>   | 0.000 | 0.003 |
|                        | <i>Aurantiporus</i>    | 0.775 | 0.036 |
|                        | <i>Bjerkandera</i>     | 1.000 | 0.376 |
|                        | <i>Burgoa</i>          | 0.007 | 0.000 |
|                        | <i>Byssomerulius</i>   | 0.000 | 0.025 |
|                        | <i>Cabalodontia</i>    | 0.008 | 0.000 |
|                        | <i>Ceraceomyces</i>    | 0.021 | 0.021 |
|                        | <i>Ceriporia</i>       | 0.535 | 0.242 |
|                        | <i>Ceriporiopsis</i>   | 0.043 | 0.005 |
|                        | <i>Chondrostereum</i>  | 0.026 | 0.001 |
|                        | <i>Coriolopsis</i>     | 0.000 | 0.007 |
|                        | <i>Daedaleopsis</i>    | 0.023 | 0.005 |
|                        | <i>Datronia</i>        | 0.027 | 0.015 |
|                        | <i>Fibroporia</i>      | 0.284 | 0.014 |
|                        | <i>Fomes</i>           | 0.039 | 0.070 |
|                        | <i>Fomitopsis</i>      | 0.111 | 0.015 |
|                        | <i>Funalia</i>         | 0.077 | 0.076 |
|                        | <i>Ganoderma</i>       | 0.029 | 0.031 |
|                        | <i>Gloeoporus</i>      | 0.007 | 0.029 |
|                        | <i>Hapalopilus</i>     | 0.021 | 0.045 |
|                        | <i>Hyphoderma</i>      | 0.042 | 0.040 |
|                        | <i>Hyphodermella</i>   | 0.000 | 0.012 |
|                        | <i>Irpex</i>           | 0.000 | 0.028 |
|                        | <i>Junghuhnia</i>      | 0.185 | 0.020 |
|                        | <i>Laetiporus</i>      | 0.116 | 0.032 |
|                        | <i>Lentinus</i>        | 0.025 | 0.020 |
|                        | <i>Lenzites</i>        | 0.009 | 0.001 |
|                        | <i>Marchandiomyces</i> | 0.000 | 0.005 |
|                        | <i>Mycoacia</i>        | 0.180 | 0.028 |

|                  |                          |       |       |
|------------------|--------------------------|-------|-------|
|                  | <i>Panus</i>             | 0.000 | 0.006 |
|                  | <i>Phanerochaete</i>     | 0.072 | 0.100 |
|                  | <i>Phlebiopsis</i>       | 0.033 | 0.032 |
|                  | <i>Pilatoporus</i>       | 0.031 | 0.008 |
|                  | <i>Piptoporus</i>        | 0.700 | 0.025 |
|                  | <i>Polyporales</i>       | 0.008 | 0.000 |
|                  | <i>Polyporus</i>         | 0.009 | 0.013 |
|                  | <i>Postia</i>            | 0.384 | 0.032 |
|                  | <i>Rhodonia</i>          | 0.000 | 0.003 |
|                  | <i>Rigidoporus</i>       | 0.038 | 0.000 |
|                  | <i>Sarcodontia</i>       | 0.044 | 0.000 |
|                  | <i>Sarcoporia</i>        | 0.009 | 0.000 |
|                  | <i>Schizophyllum</i>     | 0.016 | 0.379 |
|                  | <i>Skeletocutis</i>      | 0.174 | 0.023 |
|                  | <i>Sparassis</i>         | 0.005 | 0.000 |
|                  | <i>Steccherinum</i>      | 0.358 | 0.219 |
|                  | <i>Trametes</i>          | 0.272 | 0.270 |
|                  | <i>Trichaptum</i>        | 0.025 | 0.006 |
|                  | <i>Tyromyces</i>         | 0.803 | 0.066 |
|                  | <i>Uncobasidium</i>      | 0.146 | 0.001 |
|                  | <i>Xenasma</i>           | 0.003 | 0.000 |
|                  | <i>Xylodon</i>           | 0.003 | 0.012 |
|                  | unidentified             | 3.151 | 2.021 |
| Russulales       | <i>Artomyces</i>         | 0.055 | 0.003 |
|                  | <i>Asterostroma</i>      | 0.012 | 0.000 |
|                  | <i>Auriscalpium</i>      | 0.039 | 0.036 |
|                  | <i>Gloeocystidiellum</i> | 0.016 | 0.008 |
|                  | <i>Gloiothele</i>        | 0.005 | 0.000 |
|                  | <i>Hericium</i>          | 0.000 | 0.005 |
|                  | <i>Lactarius</i>         | 0.034 | 0.000 |
|                  | <i>Laxitextum</i>        | 0.005 | 0.012 |
|                  | <i>Peniophora</i>        | 0.001 | 0.017 |
|                  | <i>Russula</i>           | 0.017 | 0.006 |
|                  | <i>Scytinostroma</i>     | 0.014 | 0.003 |
|                  | <i>Stereum</i>           | 0.144 | 0.175 |
|                  | unidentified             | 3.363 | 2.175 |
| Sebacinales      | unidentified             | 0.000 | 0.009 |
| Thelephorales    | <i>Brevicellicium</i>    | 0.009 | 0.000 |
|                  | <i>Luellia</i>           | 0.008 | 0.000 |
|                  | <i>Pseudotomentella</i>  | 0.009 | 0.000 |
|                  | <i>Sistotremastrum</i>   | 0.039 | 0.017 |
|                  | <i>Tomentella</i>        | 0.010 | 0.007 |
|                  | <i>Trechispora</i>       | 0.480 | 0.137 |
|                  | unidentified             | 0.034 | 0.009 |
| Agaricostilbales | <i>Bensingtonia</i>      | 0.232 | 0.017 |
|                  | <i>Kondoa</i>            | 0.081 | 0.053 |
|                  | <i>Kurtzmanomyces</i>    | 0.013 | 0.000 |
|                  | <i>Ruinenia</i>          | 0.008 | 0.000 |
|                  | <i>Sterigmatomyces</i>   | 0.000 | 0.003 |
| Cystobasidiales  | <i>Buckleyzyma</i>       | 0.017 | 0.101 |
|                  | <i>Cystobasidium</i>     | 0.005 | 3.000 |

|                            |                            |       |       |
|----------------------------|----------------------------|-------|-------|
|                            | <i>Symmetrospora</i>       | 0.001 | 0.067 |
|                            | <i>Bannoa</i>              | 0.027 | 0.021 |
| <i>Erythrobasidiales</i>   | <i>Erythrobasidium</i>     | 0.010 | 0.067 |
|                            | <i>Sakaguchia</i>          | 0.000 | 0.005 |
|                            | <i>Entyloma</i>            | 0.014 | 0.000 |
| <i>Entylomatales</i>       | <i>Tilletiopsis</i>        | 0.243 | 0.028 |
|                            | unidentified               | 0.436 | 0.432 |
|                            | <i>Acaromyces</i>          | 0.000 | 0.002 |
| <i>Exobasidiales</i>       | <i>Exobasidium</i>         | 0.001 | 0.018 |
| <i>Golubeviales</i>        | <i>Golubevia</i>           | 0.029 | 0.012 |
|                            | <i>Tilletia</i>            | 0.004 | 0.000 |
|                            | unidentified               | 0.009 | 0.000 |
|                            | <i>Malassezia</i>          | 1.000 | 0.093 |
| <i>Malasseziales</i>       | unidentified               | 0.014 | 0.000 |
|                            | <i>Microbotryum</i>        | 0.038 | 0.009 |
| <i>Microbotryales</i>      | <i>Sampaiozyma</i>         | 0.001 | 0.006 |
|                            | <i>Rhodosporeidiobolus</i> | 0.029 | 0.000 |
|                            | <i>Rhodotorula</i>         | 0.008 | 1.000 |
| <i>Sporidiobolales</i>     | <i>Sporobolomyces</i>      | 4.000 | 1.000 |
|                            | unidentified               | 0.001 | 0.002 |
|                            | <i>Melampsora</i>          | 0.036 | 0.006 |
| <i>Pucciniales</i>         | <i>Pucciniastrum</i>       | 0.004 | 0.000 |
|                            | <i>Cystofilobasidium</i>   | 0.013 | 0.015 |
|                            | <i>Guehomyces</i>          | 0.004 | 0.014 |
|                            | <i>Mrakiella</i>           | 0.010 | 0.000 |
| <i>Cystofilobasidiales</i> | <i>Itersoniella</i>        | 0.172 | 0.209 |
|                            | <i>Mrakia</i>              | 0.000 | 0.002 |
|                            | <i>Udeniomyces</i>         | 3.000 | 0.122 |
|                            | unidentified               | 0.000 | 0.007 |
|                            | <i>Filobasidium</i>        | 0.047 | 0.197 |
| <i>Filobasidiales</i>      | <i>Naganishia</i>          | 0.001 | 0.008 |
|                            | <i>Solicoccozyma</i>       | 0.021 | 0.002 |
| <i>Holtermanniales</i>     | <i>Holtermanniella</i>     | 0.003 | 0.016 |
|                            | <i>Bullera</i>             | 0.332 | 0.069 |
|                            | <i>Bulleribasidium</i>     | 0.000 | 0.001 |
|                            | <i>Cryptococcus</i>        | 0.008 | 3.000 |
|                            | <i>Dioszegia</i>           | 0.061 | 0.229 |
|                            | <i>Fellomyces</i>          | 0.000 | 0.012 |
|                            | <i>Genolevuria</i>         | 0.020 | 0.017 |
| <i>Tremellales</i>         | <i>Hannaella</i>           | 0.035 | 0.006 |
|                            | <i>Papiliotrema</i>        | 0.009 | 0.134 |
|                            | <i>Sirobasidium</i>        | 0.000 | 0.003 |
|                            | <i>Tremella</i>            | 0.000 | 0.002 |
|                            | <i>Vishniacozyma</i>       | 0.051 | 0.264 |
|                            | unidentified               | 0.005 | 0.024 |
|                            | <i>Apiotrichum</i>         | 0.009 | 0.109 |
| <i>Trichosporonales</i>    | <i>Cutaneotrichosporon</i> | 0.017 | 0.009 |
| <i>Urocystidales</i>       | <i>Urocystis</i>           | 0.016 | 0.020 |
|                            | <i>Anthracoystis</i>       | 0.008 | 0.000 |
| <i>Ustilaginales</i>       | <i>Kalmanozyma</i>         | 0.009 | 0.005 |
|                            | <i>Melanopsichium</i>      | 0.004 | 0.000 |

|                            |                          |                        |       |       |
|----------------------------|--------------------------|------------------------|-------|-------|
|                            |                          | <i>Moesziomyces</i>    | 0.000 | 0.007 |
|                            |                          | <i>Sporisorium</i>     | 0.021 | 0.000 |
|                            |                          | <i>Tranzscheliella</i> | 0.009 | 0.016 |
|                            |                          | <i>Ustilago</i>        | 0.721 | 0.497 |
|                            |                          | unidentified           | 0.535 | 0.075 |
|                            | <i>Wallemiales</i>       | <i>Wallemia</i>        | 0.206 | 0.315 |
| <i>Chytridiomycota</i>     | <i>Rhizophlyctidales</i> | <i>Rhizophlyctis</i>   | 0.000 | 0.005 |
|                            | <i>Spizellomycetales</i> | <i>Powellomyces</i>    | 0.000 | 0.006 |
| <i>Entomophthoromycota</i> | <i>Basidiobolales</i>    | <i>Basidiobolus</i>    | 0.000 | 0.008 |
|                            | <i>Entomophthorales</i>  | <i>Conidiobolus</i>    | 0.161 | 0.000 |
| <i>Mortierellomycota</i>   | <i>Mortierellales</i>    | <i>Mortierella</i>     | 0.059 | 8.000 |
| <i>Mucormycota</i>         | <i>Mucorales</i>         | <i>Mucor</i>           | 0.000 | 0.016 |
|                            | <i>Mucorales</i>         | <i>Rhizopus</i>        | 0.001 | 0.000 |
|                            |                          | unassigned             | 6.000 | 8.000 |
|                            |                          | unidentified           | 3.927 | 5.676 |

\*percentage share of studied genera greater than 0.001%; \*\* Kingdom Protista

**Table S3.** The limits of detection of extrolites in dust samples.

| Metabolite                              | LOD (µg/kg) |
|-----------------------------------------|-------------|
| 15-Acetyldeoxynivalenol                 | 4.7         |
| 15-Hydroxyculmorin                      | 1.7         |
| 15-Methyl_ <i>epi</i> _Fumiquinazolin A | N/A         |
| 16-Ketoaspergillimide                   | 0.13        |
| 2-Chlorunguinol                         | 0.02        |
| 2-Methylmitorubin                       | 1.4         |
| 3-Acetyldeoxynivalenol                  | 4.8         |
| 3-Nitropropionic acid                   | 0.71        |
| 4-Hydroxyalternariol                    | 2.2         |
| 4-Monoacetoxyscirpenol                  | N/A         |
| 5-Methylmellein                         | 2.6         |
| 7-Hydroxykaurenolid                     | 0.67        |
| 7-Hydroxypestalotin                     | 0.49        |
| A 23187                                 | N/A         |
| AAL-TA Toxin                            | 1.5         |
| Absciscic acid                          | 15          |
| Acetylchaetoglobosin D                  | 0.65        |
| Acuminatum B                            | 7.3         |
| Acuminatum C                            | 17          |
| Aflatoxicol                             | 0.23        |
| Aflatoxin B1                            | 0.17        |
| Aflatoxin B2                            | 0.04        |
| Aflatoxin G1                            | 0.10        |
| Aflatoxin G2                            | 0.35        |
| Aflatoxin M1                            | 0.11        |
| Aflatoxin M2                            | N/A         |
| Aflatoxin P1                            | 0.11        |
| Aflatoxin Q1                            | 0.50        |
| Aflatrem                                | N/A         |
| Aflavarin                               | N/A         |
| Agistatin B                             | 248         |
| Agistatin D                             | 6.3         |
| Agistatin E                             | 2.1         |
| Agroclavin                              | 0.10        |
| Aigualomycin D                          | 2.6         |
| Alamethicin F30                         | 0.45        |
| alpha Zearalenol                        | 0.59        |
| alpha Zearalenol Glucoside              | 1.5         |
| Alteichin                               | N/A         |
| Altenusin                               | 29          |
| Alternarian acid                        | 127         |
| Alternariol                             | 0.10        |
| Alternariol-3-Glucoside                 | 1.1         |
| Alternariol-9-Glucoside                 | 0.87        |
| Alternariolmethylether                  | 0.11        |
| Alternariolmethylether-glucoside        | 10          |
| Altersetin                              | 0.89        |
| Altersolanol                            | 126         |



|                          |      |
|--------------------------|------|
| Altertoxin II            | N/A  |
| Altertoxin-I             | 0.96 |
| Amidepsin B              | 0.97 |
| Aminodimethyloctadecanol | 13   |
| Amoxycillin              | N/A  |
| Amphotericin             | N/A  |
| Anacin                   | 0.93 |
| Andrastin A              | 0.22 |
| Andrastin B              | 0.83 |
| Andrastin C              | N/A  |
| Andrastin D              | N/A  |
| Anisomycin               | 0.25 |
| Anomalin A               | N/A  |
| Antibiotic F1849 A       | 0.22 |
| Antibiotic L 696474      | 27   |
| Antibiotic PF 1052       | 2.5  |
| Antibiotic Y             | 6.9  |
| Apicidin                 | 0.20 |
| Ascochlorin              | 0.07 |
| Ascofuranone             | 0.07 |
| Ascomycin                | 1.1  |
| Asparason A              | N/A  |
| Aspercolorin             | 1.1  |
| Asperfuran               | 3.7  |
| Aspergamid A             | 0.65 |
| Aspergillicin Derivative | 0.30 |
| Aspergillimide           | 0.03 |
| Aspergillin PZ           | N/A  |
| Asperglaucide            | 0.03 |
| Asperlacton              | 0.66 |
| Asperloxine A            | 0.26 |
| Asperphenamate           | 0.39 |
| Asperthecin              | N/A  |
| Aspinolid B              | 0.07 |
| Aspinonene               | 0.35 |
| Aspinonene               | N/A  |
| Aspochalasin C           | 5.3  |
| Aspochalasin D           | 0.39 |
| Aspochalasin I           | 1.2  |
| Aspochalasin J           | 1.7  |
| Aspterric acid           | 18   |
| Aspyrone                 | 5.3  |
| Asteltoxin               | 0.68 |
| Asterric acid            | 0.15 |
| Atlantinon A             | 0.65 |
| Atpenin A5               | 0.21 |
| Atroventinmethylether    | 0.27 |
| Aurantiamin A            | 0.59 |
| Auranticin A             | 5.2  |
| Aurantia                 | 0.26 |
| Aurasperon B             | N/A  |

|                          |      |
|--------------------------|------|
| Aurasperon C             | N/A  |
| Aurasperon G             | N/A  |
| Aureobasidin A           | 2.9  |
| Aurofusarin              | 1.1  |
| Austalide A              | 0.57 |
| Austalide B              | 0.11 |
| Austalide D              | 0.34 |
| Austalide F              | 0.65 |
| Austamide                | 0.58 |
| Austdiol                 | N/A  |
| Austocystin A            | 0.11 |
| Austocystin D            | 0.81 |
| Austocystin I            | 0.55 |
| Averantin                | 0.04 |
| Averantinmethylether     | 0.03 |
| Averufin                 | 0.02 |
| Averufin Derivat         | 0.02 |
| Bacitracin               | N/A  |
| Bafilomycin A1           | 0.27 |
| Barceloneic acid         | 0.55 |
| Bassianolide             | 0.02 |
| Beauvericin              | 0.06 |
| Benzomalvin A            | 2.1  |
| Benzomalvin C            | 0.36 |
| Berkedrimane B           | 0.27 |
| Berkeleyacetal B         | 5.6  |
| beta Zearalenol          | 2.9  |
| beta-Zearalenol Glucosid | 0.85 |
| Bikaverin                | 0.46 |
| Bismethylthioglotoxin    | 0.86 |
| Brasiliamide A           | 0.27 |
| Brefeldin A              | 20   |
| Brevianamid F            | 0.35 |
| Brevicompanine B         | 0.08 |
| Butenolid                | 3.2  |
| Butyrolacton II          | 2.8  |
| Butyrolacton III         | 0.52 |
| Butyrolactone I          | 1.1  |
| Calonectrin              | 19   |
| Calphostin C             | 3.4  |
| Calyxanthone             | 3.9  |
| Carnequinazolin A        | 0.24 |
| Cephalochromin           | N/A  |
| Cephalosporin C          | N/A  |
| Cercosporamide           | 0.09 |
| Cercosporin              | 11   |
| Cereulide                | 0.19 |
| Chaetocin                | 38   |
| Chaetoglobosin D         | 30   |
| Chaetoviridin A          | 0.88 |
| Chanoclavin              | 0.02 |

|                    |      |
|--------------------|------|
| Chetomin           | 1.0  |
| Chetoseminudin     | N/A  |
| Chevalone C        | 0.25 |
| Chlamydospordiol   | 0.08 |
| Chlamydosporol     | 0.34 |
| Chloramphenicol    | 0.03 |
| Chlorocitreorosein | 0.63 |
| Chloronectrin.2    | 0.06 |
| Chlortetracyclin   | N/A  |
| Chrodrimanin       | 9.1  |
| Chromomycin A3     | N/A  |
| Chrysogin          | 0.56 |
| Chrysophanol       | 4.0  |
| Cinereanin         | 1.3  |
| Citreohybriddione  | 19   |
| Citreohybridinol   | 0.09 |
| Citreorosein       | 0.74 |
| Citreoviridin      | 0.18 |
| Citreoviridin C    | N/A  |
| Citreoviridinol    | N/A  |
| Citrinin           | 0.30 |
| Cladosporin        | 1.1  |
| Clonostachydiol    | 0.33 |
| CNM 115443         | 0.43 |
| Cochliodinol       | N/A  |
| Cochlioquinone A   | N/A  |
| Colchicin          | 0.51 |
| Communesin B       | 0.27 |
| Culmorin           | 1.3  |
| Curvularin         | 0.36 |
| Curvulin           | 0.27 |
| cyclo(L-Leu-L-Pro) | 0.53 |
| cyclo(L-Pro-L-Tyr) | 8.5  |
| cyclo(L-Pro-L-Val) | 1.2  |
| Cycloaspeptide A   | 0.09 |
| Cycloechinulin     | 0.11 |
| Cycloheximide      | 3.6  |
| Cyclopenin         | 0.09 |
| Cyclopenol         | 0.82 |
| Cyclopeptine       | 0.05 |
| Cyclosporin A      | 5.4  |
| Cyclosporin B      | 1.1  |
| Cyclosporin C      | 9.2  |
| Cyclosporin D      | 2.4  |
| Cyclosporin H      | 0.83 |
| Cylindrocarpon A4  | 0.01 |
| Cylindrol B        | 0.03 |
| Cytochalasin A     | 1.7  |
| Cytochalasin B     | 1.5  |
| Cytochalasin C     | 0.69 |
| Cytochalasin D     | 0.16 |

|                            |      |
|----------------------------|------|
| Cytochalasin E             | 0.43 |
| Cytochalasin H             | 2.0  |
| Cytochalasin J             | 1.2  |
| Daunorubicin               | 21   |
| Deacetylneosolaniol        | 1.3  |
| Decalonectrin              | 2.6  |
| Decarestrictin             | 28   |
| Dechlorogriseofulvin       | 0.43 |
| Dechloroisochromophilon IV | 1.2  |
| Dechoronornidulin          | 0.08 |
| Deepoxy-DON                | 7.8  |
| Dehydroaustinol            | 1.1  |
| Dehydrocurvularin          | 0.96 |
| Dehydrocyclopeptine        | 1.1  |
| Dehydrogriseofulvin        | 0.03 |
| Demethylasteltoxin         | 0.87 |
| Demethylsulochrin          | 0.58 |
| Deoxyaltersolaniol A       | N/A  |
| Deoxyaltersolanol          | 11   |
| Deoxybrevianamid E         | 2.1  |
| Deoxyfusapyron             | 0.80 |
| Deoxynivalenol             | 4.0  |
| Deoxynivalenol-15-Sulfate  | N/A  |
| Deoxynivalenol-3-Sulfate   | N/A  |
| Deoxynortryptoquivalin A   | 0.62 |
| Deoxypentahydroxyscirpenol | N/A  |
| Deoxytryptoquialanine      | N/A  |
| Deoxytryptoquivaline A     | 0.27 |
| Desoxypaxillin             | N/A  |
| Desoxyverrucosidin         | N/A  |
| Destruxin A                | 0.07 |
| Destruxin B                | 0.33 |
| Destruxin CHL              | 0.79 |
| Destruxin D                | 0.37 |
| Destruxin-Ed Derivat       | 0.66 |
| Dethiosecoemestrin         | N/A  |
| Diacetoxyscirpenol         | 0.14 |
| Dichlordiaportin           | 0.64 |
| Dichlormethylasterric acid | 0.36 |
| Dihydrobotrydial           | N/A  |
| Dihydrochlamydocin         | 0.22 |
| Dihydrocitrinone           | 0.77 |
| Dihydroergosine            | 0.08 |
| Dihydroergotamin           | 0.24 |
| Dihydrogriseofulvin        | 0.95 |
| Dihydrogriseofulvin        | N/A  |
| Dihydroinfectopyron        | 0.32 |
| Dihydrosterigmatocystin    | N/A  |
| Dihydrotrichotetronine     | 2.3  |
| Dihydroxycalonectrin       | 11   |
| Dihydroxycalonectrin       | N/A  |

|                            |       |
|----------------------------|-------|
| Dihydroxymellein           | 0.51  |
| DihydroxyZONdimethylether  | 2.6   |
| Dihydroxy-ZON-Mrethylether | N/A   |
| Dimethoxymethylgrisantrion | N/A   |
| Dinactin                   | N/A   |
| Diplodiatoxin              | 2.0   |
| Diydrolysergol             | 0.10  |
| DON-3-Glucoside            | 7.6   |
| DON-Glutathion             | N/A   |
| Doxorubicin                | 11    |
| Doxycyclin                 | N/A   |
| Drimane 6                  | 0.48  |
| Drimane 8                  | 1.1   |
| Elymoclavin                | 0.18  |
| Elymoclavin-Fructoside     | 0.15  |
| Emindole SA                | 0.61  |
| Emindole SA                | N/A   |
| Emodin                     | 0.06  |
| Endocrocin                 | 15    |
| Enniatin A                 | 0.007 |
| Enniatin A1                | 0.06  |
| Enniatin B                 | 0.006 |
| Enniatin B1                | 0.03  |
| Enniatin B2                | 0.17  |
| Enniatin B3                | 0.001 |
| Epiequisetin               | 0.10  |
| Epoxyagroclavin            | 0.21  |
| Epoxyagroclavin            | N/A   |
| Epoxycytochalasin C        | 0.84  |
| Equisetin                  | 0.10  |
| Eremofortin A              | 0.77  |
| Ergine                     | 0.04  |
| Ergocornine                | 0.36  |
| Ergocorninin               | 0.19  |
| Ergocristam                | N/A   |
| Ergocristinam              | N/A   |
| Ergocristine               | 0.35  |
| Ergocristinin              | 0.12  |
| Ergocryptin                | 0.28  |
| Ergocryptinin              | 0.18  |
| Ergometrin                 | 0.71  |
| Ergometrinin               | 0.03  |
| Ergosin                    | 0.42  |
| Ergosinin                  | 0.04  |
| Ergotamin                  | 0.47  |
| Ergotaminin                | 0.23  |
| Ergovaline                 | N/A   |
| Erythromycin               | N/A   |
| F01-1358A                  | 0.22  |
| Fallacinol                 | 0.11  |
| Fellutannine               | 0.48  |

|                        |      |
|------------------------|------|
| Fellutannine B         | 1.9  |
| Festuclavin            | 0.02 |
| FK 506                 | 1.0  |
| FK 9775 A              | N/A  |
| FK 9775 B              | N/A  |
| Flavipucin             | 0.59 |
| Flavoglaucin           | 0.03 |
| Folipastin             | 0.04 |
| Fonsecin               | N/A  |
| FS4                    | N/A  |
| Fulvic acid            | 13   |
| Fumagillin             | 9.0  |
| Fumagillol             | 10   |
| Fumigaclavin A         | 0.12 |
| Fumigaclavin C         | 0.83 |
| Fumiquinazolin A       | 0.18 |
| Fumiquinazolin D       | 0.27 |
| Fumiquinazolin Derivat | 0.85 |
| Fumiquinazolin E       | N/A  |
| Fumiquinazolin F       | 11   |
| Fumiquinazolin I       | N/A  |
| Fumitremorgin A        | 0.89 |
| Fumitremorgin B        | N/A  |
| Fumitremorgin C        | 0.19 |
| Fumonisin A1           | N/A  |
| Fumonisin A1 Vorstufe  | 0.59 |
| Fumonisin A2           | N/A  |
| Fumonisin B1           | 2.4  |
| Fumonisin B2           | 1.7  |
| Fumonisin B3           | 5.8  |
| Fumonisin B4           | N/A  |
| Fumonisin B6           | N/A  |
| Fungerin               | 0.20 |
| Fusaproliferin         | 40   |
| Fusapyron              | 0.73 |
| Fusarenon-X            | 3.9  |
| Fusarielin A           | 39   |
| Fusarin C              | 42   |
| Fusarinolic acid       | N/A  |
| Geldanamycin           | 0.46 |
| Geodin                 | 17   |
| Geodin hydrate         | 0.40 |
| Gibberellic acid       | 2.2  |
| Gibepyrone D           | 4.3  |
| Gliocladic acid        | 2.4  |
| Gliotoxin              | 0.91 |
| Glyantrypin            | 0.85 |
| Gregatin B             | N/A  |
| Griseofulvin           | 0.14 |
| Griseophenone B        | 1.1  |
| Griseophenone C        | 0.33 |

|                          |      |
|--------------------------|------|
| Harzianopyridine         | 0.07 |
| Harzianum A              | 13   |
| HC-Toxin                 | 1.9  |
| Helvolic acid            | 2.1  |
| Helvolinic acid          | 12   |
| Helvolinic acid          | N/A  |
| Heptaibin                | 24   |
| Heptelidic acid          | 8.7  |
| Herguline A              | 0.06 |
| HT-2 Glucoside           | 1.7  |
| HT-2 Toxin               | 0.81 |
| hydrolysed Fumonisin B1  | 0.20 |
| hydrolysed Nidulin       | N/A  |
| Hydroxycarnequinazolin A | 0.87 |
| Hydroxycurvularin        | 0.94 |
| Hydroxyroquefortine C    | N/A  |
| Hydroxysydonic acid      | 1.8  |
| Hypothemycin             | 3.7  |
| Ilicicolin A             | 0.02 |
| Ilicicolin B             | 0.58 |
| Ilicicolin C             | 0.23 |
| Ilicicolin E             | 0.03 |
| Infectopyron             | 13   |
| Integracin A             | 0.04 |
| Integracin B             | 0.09 |
| Ionomycin                | 8.1  |
| Irgasan                  | 129  |
| Isochromophilon III      | 22   |
| Isochromophilon IV       | 2.0  |
| Isochromophilon IX       | 0.19 |
| Isochromophilone VI      | 0.80 |
| Isofusidienol            | 0.07 |
| Isokotanin B             | 0.24 |
| Iso-Rhodoptilometrin     | 0.03 |
| Josamycin                | N/A  |
| K 252a                   | 0.38 |
| K252b                    | 7.3  |
| K-76 Derivative 4        | 0.52 |
| Kipukasin B              | 0.28 |
| Kipukasin D              | 0.94 |
| KO 143                   | 7.5  |
| Kojic acid               | 20   |
| Koninginin D             | 2.6  |
| Koninginin E             | 0.63 |
| Linamarin                | 2.3  |
| Lincomycin               | N/A  |
| LL-Z 1272e               | 0.02 |
| Lolitrem B               | N/A  |
| Lolitrem N               | N/A  |
| Lotaustralin             | 1.3  |
| Luteoskyrin              | N/A  |

|                        |      |
|------------------------|------|
| Luteusin A             | 0.71 |
| Lysergol               | 0.24 |
| Macrosphaelide A       | 0.20 |
| Macrosporin            | 0.13 |
| Malformin A            | 0.10 |
| Malformin C            | 0.11 |
| Marcfortine A          | 0.04 |
| Marcfortine B          | N/A  |
| Marcfortine C          | N/A  |
| Meleagrins             | 0.54 |
| Meleagrins Derivative  | 0.27 |
| Methoxycurvarin        | 0.45 |
| Methoxystigmatocystin  | 0.03 |
| Methylsteric acid      | 0.12 |
| Methylequisetin        | 0.08 |
| Methylfunicin          | 0.04 |
| Methylsulochrin        | 0.03 |
| Methysergide           | 0.04 |
| Mevastatin             | 1.4  |
| Mevinolin              | 0.21 |
| Mithramycin C          | N/A  |
| Mitomycin              | N/A  |
| Monactin               | 0.15 |
| Moniliformin           | 1.0  |
| Monoacetoxyscirpenol   | 1.2  |
| Monocerin              | 0.06 |
| Monomethylcurvulin     | 1.3  |
| Mycophenolic acid      | 1.1  |
| Mycophenolic acid IV   | 0.20 |
| Myriocin               | 2.7  |
| Mytoxin C              | 26   |
| N-Benzoylphenylalanine | 0.13 |
| Neoechinulin A         | 0.94 |
| Neosolaniol            | 0.15 |
| Neoxaline              | 0.12 |
| NG 012                 | 1.4  |
| Nidulin                | 0.01 |
| Nigericin              | 0.03 |
| NIgragillin            | N/A  |
| Nigrosporoate A        | 7.0  |
| Nivalenol              | 0.77 |
| Nivalenol Glucoside    | 1.1  |
| Nonactin               | 0.05 |
| Norlichexanthone       | 0.23 |
| Nornidulin             | 0.03 |
| Norsolorinic acid      | 0.03 |
| Nortryptoquialanine    | N/A  |
| Norverrucosidin        | 0.57 |
| Notoamide Derivative   | 0.10 |
| Notoamide E Derivative | 0.10 |
| NP 12318               | 0.08 |



|                          |      |
|--------------------------|------|
| NP 19199                 | 4.5  |
| NP 8140                  | 17   |
| NT-2 Toxin               | 0.36 |
| NX-1                     | N/A  |
| NX-2                     | N/A  |
| NX-3                     | N/A  |
| Ochratoxin A             | 0.14 |
| Ochratoxin alpha         | 0.95 |
| Ochratoxin B             | 0.11 |
| Ochratoxin C             | 0.01 |
| Ochrephilone             | 0.08 |
| Okaramine B              | 0.28 |
| Okaramine D              | 0.88 |
| Oligmycin B              | 14   |
| Oligomycin A             | 7.9  |
| O-Methylsterigmatocystin | 0.04 |
| O-Methylviridicatin      | 0.02 |
| Ophiobolin A             | 4.4  |
| Ophiobolin B             | 32   |
| Oxalicine B              | 2.2  |
| Oxaline                  | 0.08 |
| oxidized Elymoclavin     | 2.3  |
| oxidized Luol            | 0.46 |
| Oxytetracyclin           | N/A  |
| Papyracillic acid A      | 4.0  |
| Paracelsin A             | N/A  |
| Paracelsin B             | N/A  |
| Paraherquamide A         | 0.09 |
| Paraherquamide E         | 0.36 |
| Paspalic acid            | 5.4  |
| Paspalin                 | N/A  |
| Paspalinin               | N/A  |
| Paspalitrem A            | N/A  |
| Paspalitrem B            | N/A  |
| Patulin                  | 11   |
| Paxillin                 | 3.7  |
| Penicillazaphilone B     | 0.61 |
| Penicillic acid          | 0.45 |
| Penicillide              | 0.97 |
| Penicillin V             | N/A  |
| Penigequinolone A        | 0.12 |
| Penitrem A               | 0.41 |
| Pennigritrem A           | 2.3  |
| Pentoxifylline           | 0.04 |
| Pestalotin               | 0.64 |
| Phenopyrrozin            | 0.31 |
| Phomalactone             | 0.61 |
| Phomalone                | 0.06 |
| Phomopsin A              | 3.8  |
| Phomopsin B              | N/A  |
| Phomopsolide B           | 1.1  |

|                          |       |
|--------------------------|-------|
| Physcion                 | 6.8   |
| Pinselin                 | 0.60  |
| Piscarinin A             | 0.46  |
| Porritoxinol             | 1.2   |
| PR Toxin                 | N/A   |
| Prehelminthosporol       | N/A   |
| Prehelminthosporollacton | N/A   |
| Prelaptin                | 0.31  |
| Pseurotin A              | 1.5   |
| Pseurotin D              | N/A   |
| Puberulin A              | 0.66  |
| Puromycin                | 0.29  |
| Purpactin A              | 0.33  |
| Purpuride                | 0.08  |
| Pyranonigrin             | 5.6   |
| Pyrenocin A              | 1.6   |
| Pyrenophorol             | 0.96  |
| Pyripyropene A           | 0.58  |
| Pyripyropene B           | N/A   |
| Pyripyropene D           | 0.29  |
| Pyrophen                 | 0.26  |
| Quadrone                 | 2.3   |
| Questionmycin A          | 0.82  |
| Quinadoline A            | 0.74  |
| Quinadoline B            | 2.7   |
| Quinolactacin A          | 0.009 |
| Quinolone A              | 2.1   |
| Radicicol                | 0.19  |
| Radiclonic acid          | 23    |
| Rapamycin                | 15    |
| Rasfonin                 | 3.1   |
| Roquefortine C           | 0.35  |
| Roquefortine D           | 0.48  |
| Roquefortine E           | 0.08  |
| Roridin A                | 1.0   |
| Roridin L-2              | N/A   |
| Rorotoxin A              | 16    |
| Rubellin D               | 0.09  |
| Rubratoxin A             | N/A   |
| Rugulosin                | 1.2   |
| Rugulotrosin             | 24    |
| Rugulovasine A           | 0.12  |
| Rugulusovin              | 0.45  |
| Sambucinol               | 4.5   |
| Satratoxin F             | N/A   |
| Satratoxin G             | N/A   |
| Satratoxin H             | N/A   |
| Scalusamid A             | 0.32  |
| Sch 725680               | N/A   |
| Sclerotioramin           | 0.30  |
| Sclerotiorin             | 3.7   |

|                                 |      |
|---------------------------------|------|
| Secalonic acid D                | 0.86 |
| seco-Sterigmatocystin           | 0.13 |
| semi Xanthomegnin               | N/A  |
| semi-Xanthomegnin               | 1.5  |
| Setosusin                       | 1.1  |
| Siccanin                        | 0.93 |
| Siccanol                        | N/A  |
| Skyrin                          | 0.08 |
| S-Methyl-deoxynivalenol         | N/A  |
| Sphingofungin D                 | 0.77 |
| Spiramycin                      | N/A  |
| Spirodihydrobenzofuranlactam IV | 0.46 |
| Sporogen AO I                   | 3.1  |
| Stachybotryamide                | 0.69 |
| Stachybotrylactam               | 0.22 |
| Sterigmatocystin                | 0.06 |
| Sulochrin                       | 0.16 |
| Sydonic acid                    | 0.08 |
| Sydowinin A                     | 2.9  |
| Synazerol                       | N/A  |
| T-2 Toxin                       | 0.41 |
| T2-Glucoside                    | N/A  |
| T2-Triol                        | 2.6  |
| Taxol                           | N/A  |
| Tensidol B                      | N/A  |
| Tentoxin                        | 0.11 |
| Tenuazonic acid                 | 30   |
| Ternatin                        | 0.27 |
| Terpendole C                    | N/A  |
| Terpendole E                    | N/A  |
| Terphenyllin                    | 2.1  |
| Terrecyclic acid                | 4.0  |
| Terretonin                      | 3.4  |
| Terretonin F Derivat            | 1.4  |
| Territrem B                     | 0.59 |
| Tetrahydrobostrycin             | 1.1  |
| Thielavin B                     | 0.29 |
| Thiolutin                       | 3.5  |
| TR-2 Toxin                      | N/A  |
| Triacetyl-DON                   | 1.8  |
| Trichalasin B                   | 0.34 |
| Trichodermamide C               | 0.85 |
| Trichodermin                    | 1.2  |
| Trichodimerol                   | 0.27 |
| Trichostatin A                  | 0.30 |
| Trichotetronin                  | 2.2  |
| Trichothecin                    | N/A  |
| Trichothecolone                 | N/A  |
| Trypacidin                      | 0.09 |
| Trypacidin                      | N/A  |
| Tryprostatin A                  | 0.41 |

|                          |      |
|--------------------------|------|
| Tryprostatin B           | 1.5  |
| Tryprostatin B           | N/A  |
| Tryptophol               | 3.5  |
| Tryptoquialanine         | N/A  |
| Tryptoquialanine Derivat | 0.39 |
| Tryptoquialanone         | N/A  |
| Tryptoquivaline A        | 0.48 |
| Tryptoquivaline F        | 0.67 |
| Tryptoquivaline G        | 0.32 |
| Tylosin                  | N/A  |
| Unguinol                 | 0.06 |
| Unugisin E               | 0.75 |
| Usnic acid               | 0.02 |
| Ustiloxin A              | N/A  |
| Ustiloxin B              | N/A  |
| Ustiloxin D              | N/A  |
| Ustusol A                | 0.17 |
| Valinomycin              | 0.47 |
| Vancomycin               | N/A  |
| Vermistatin              | 0.24 |
| Verrucarin A             | 1.2  |
| Verrucarin A             | N/A  |
| Verrucarin J             | 5.6  |
| Verrucarin J             | N/A  |
| Verrucarol               | N/A  |
| Verrucofortine           | 0.02 |
| Verrucosidin             | N/A  |
| Verruculogen             | 4.6  |
| Verruculotoxin           | 0.08 |
| Versicolorin A.2         | 0.05 |
| Versicolorin C           | 0.13 |
| Verticillin A            | 0.92 |
| Violaceic acid           | 1.6  |
| Viomellein               | 22   |
| Vioxanthin               | N/A  |
| Viridicatin              | 0.15 |
| Viridicatol              | 2.9  |
| Viridicatumtoxin         | 87   |
| Viridol                  | 2.6  |
| WIN 64821                | 0.33 |
| WIN 68577                | 3.6  |
| Wortmannin               | 1.3  |
| Xanthomegnin             | 43   |
| Xanthotoxin              | 0.04 |
| Yaequinolone J2          | N/A  |
| Zaragozic acid A         | N/A  |
| Zearalenone              | 0.16 |
| Zearalenone-16-Glucoside | N/A  |
| Zearalenone-4-Glucoside  | N/A  |
| Zearalenone-14-Sulfate   | N/A  |
| Zinndiol                 | 2.6  |

|                                          |     |
|------------------------------------------|-----|
| Zinniamide                               | 1.1 |
| Zinniol                                  | 5.1 |
| N/A- no quantitative standard available. |     |

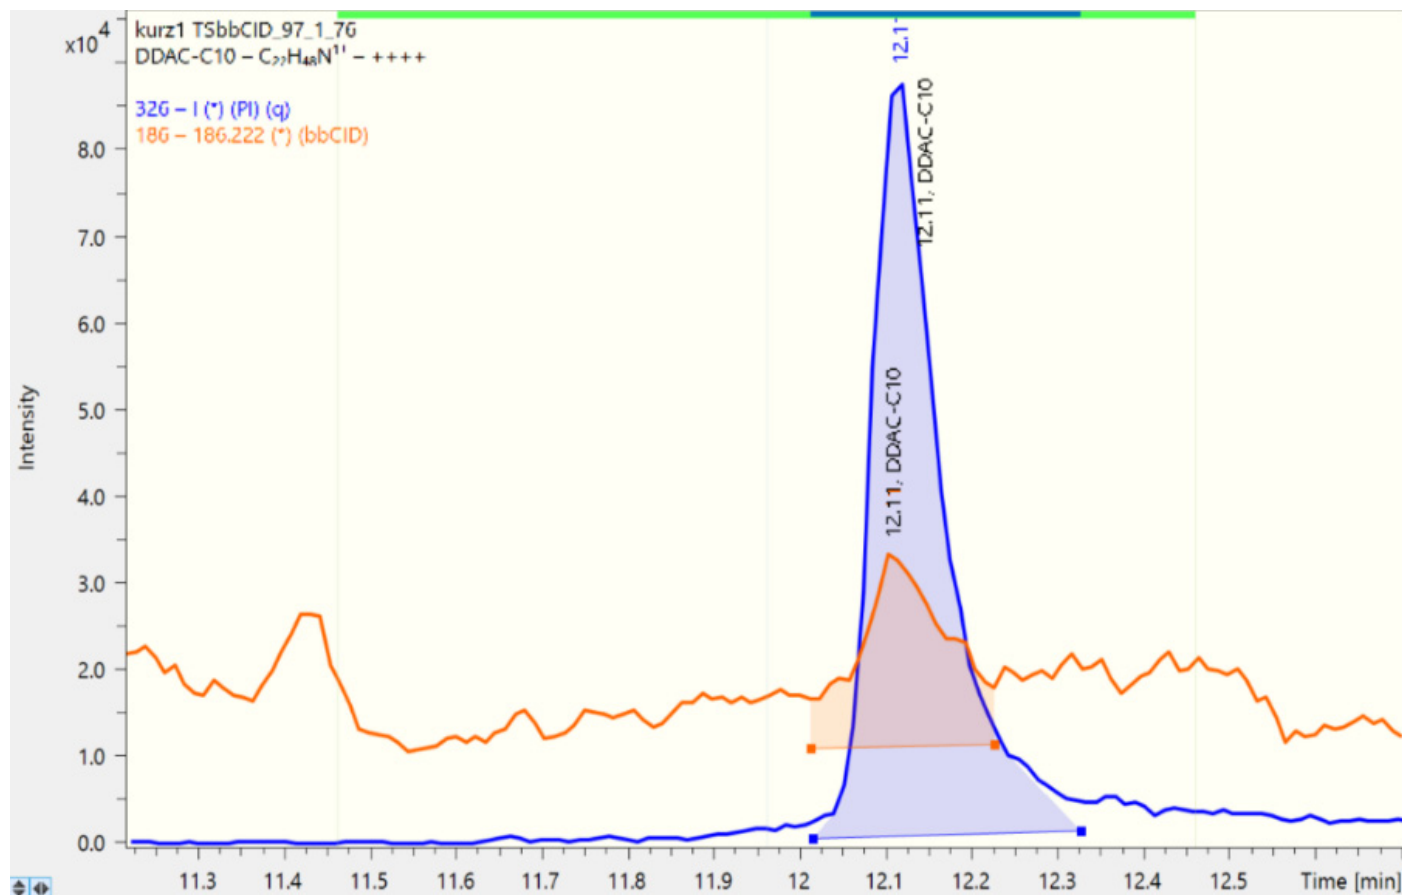

**Figure S1.** EICs of DDAC-C10 ions measured with bbCID Targetscreeener positive method.
